# Supplementary material for: A promising strategy for improved solubilization of ionic drugs simply by electrostatic pushing
Source: Royal Society of Chemistry journal article supplement (doi:10.1039/c7ra08056e), 2017-01-01
Supplement: c7ra08056e1.pdf [file c7ra08056e1.pdf]

## A promising strategy for improved solubilization of ionic drugs simply by electrostatic pushing

Mohd Afzal, Pronab Kundu, Sinjan Das, Saptarshi Ghosh and Nitin Chattopadhyay\*

Department of Chemistry, Jadavpur University, Kolkata - 700 032, India

\*Corresponding author: Fax: 91-33-2414-6584

E-mail: [nitin.chattopadhyay@yahoo.com](mailto:nitin.chattopadhyay@yahoo.com)

### Electronic Supplementary Information

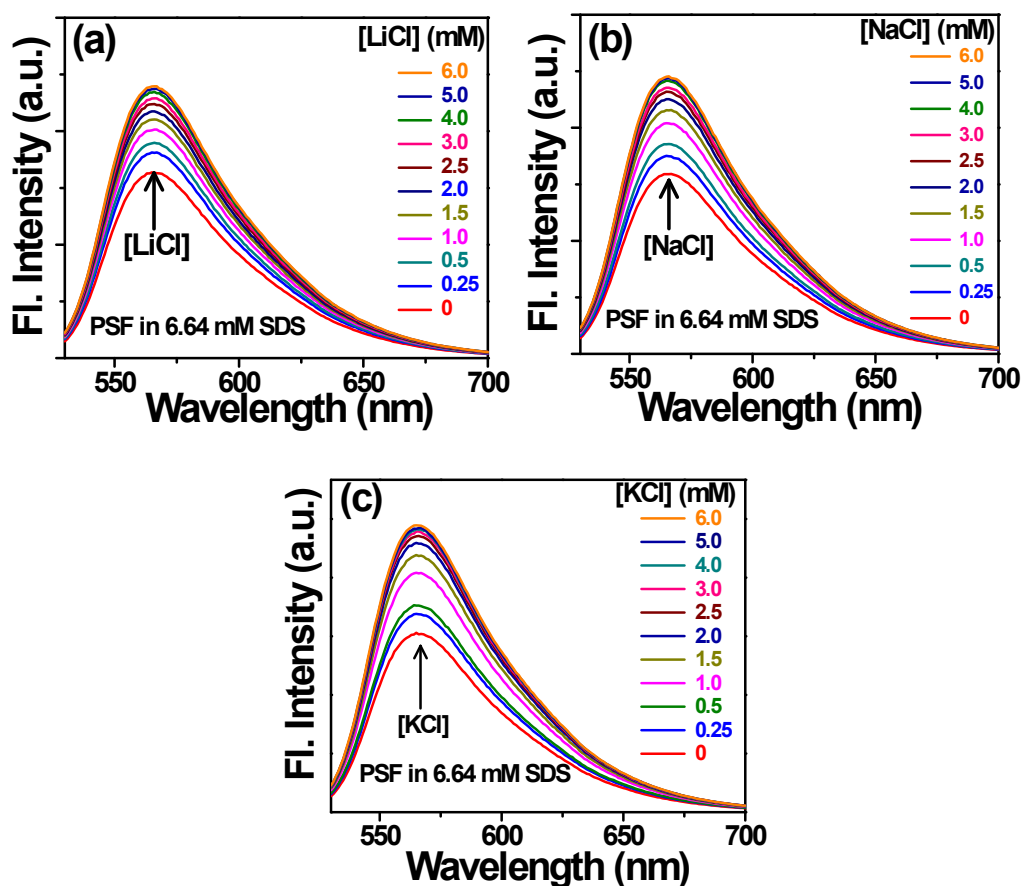

**Fig. S1** Fluorescence spectra of PSF in 6.64 mM SDS with the addition of (a) LiCl, (b) NaCl and (c) KCl respectively. Concentrations of the salts are provided in the legends.  $\lambda_{\text{exc}} = 520$  nm.

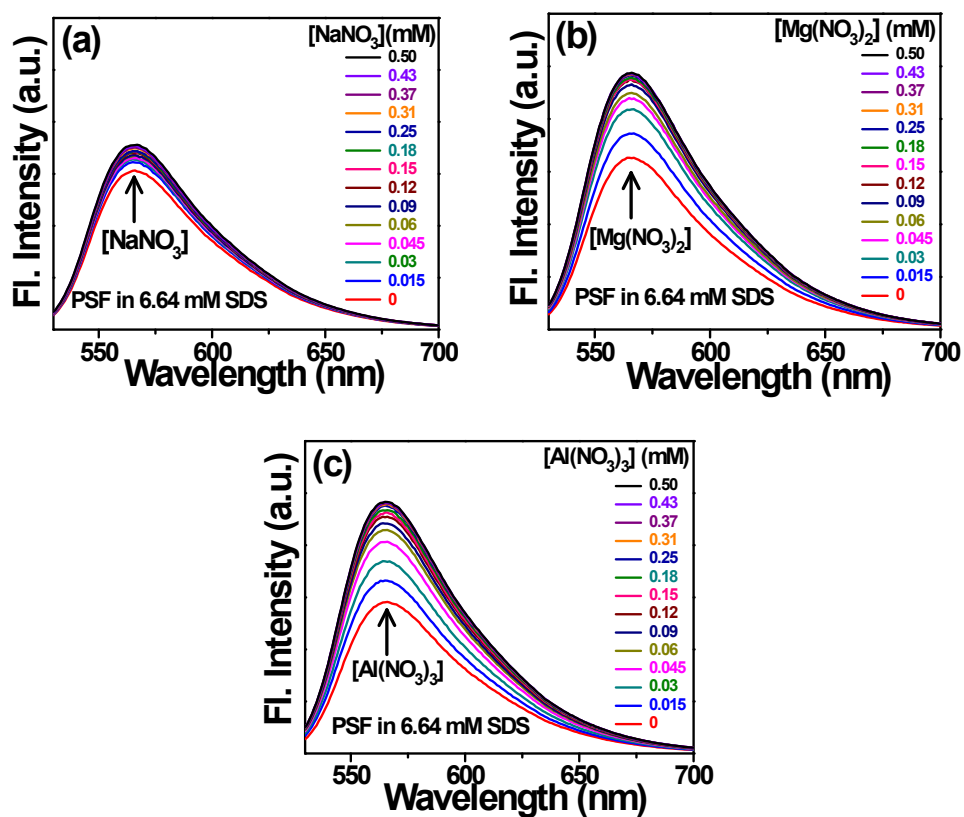

**Fig. S2** Fluorescence spectra of PSF in 6.64 mM SDS with the addition of (a)  $\text{NaNO}_3$ , (b)  $\text{Mg}(\text{NO}_3)_2$  and (c)  $\text{Al}(\text{NO}_3)_3$  respectively. Concentrations of the added salts are provided in the legends.  $\lambda_{\text{exc}} = 520 \text{ nm}$ .

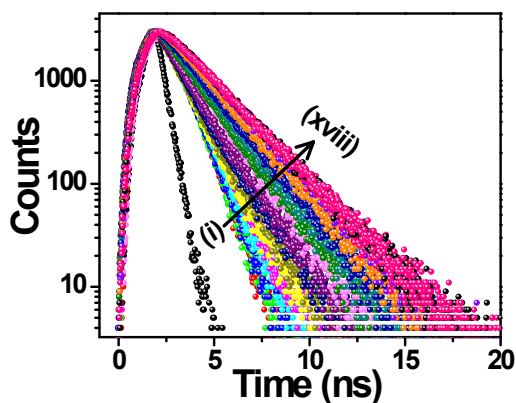

**Fig. S3** Time resolved fluorescence decays of PSF with the addition of SDS. Curves (i)  $\rightarrow$  (xviii) in correspond to  $[\text{SDS}] = 0, 1.0, 2.0, 4.0, 5.0, 5.43, 5.91, 6.40, 6.64, 6.76, 6.89, 7.00, 7.13, 7.37, 8.58, 9.78, 10.98, \text{ and } 13.35 \text{ mM}$  respectively. The sharp profile (black) on the left is the instrument response function (IRF).  $[\text{PSF}] = 5 \mu\text{M}$ ,  $\lambda_{\text{exc}} = 490 \text{ nm}$  and  $\lambda_{\text{em}} = \lambda_{\text{em}}^{\text{max}}$ .

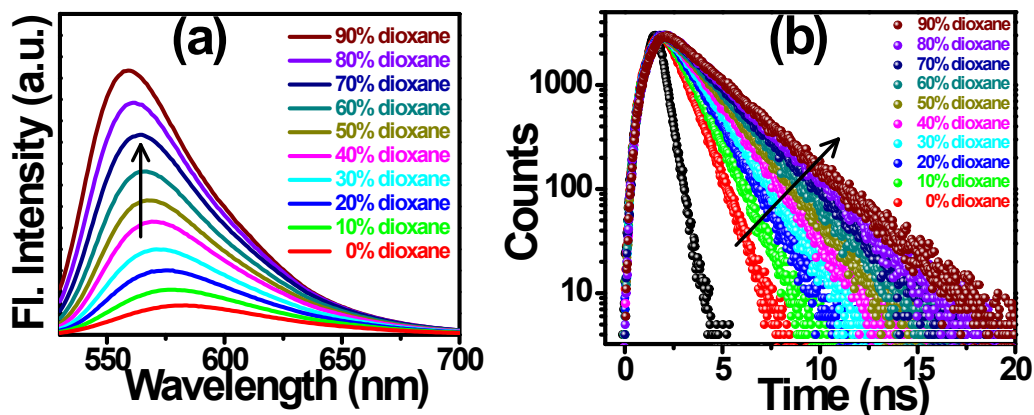

**Fig. S4** (a) Steady state fluorescence spectra ( $\lambda_{\text{exc}} = 520 \text{ nm}$ ) and (b) time resolved fluorescence decay profiles ( $\lambda_{\text{exc}} = 490 \text{ nm}$  and  $\lambda_{\text{em}} = \lambda_{\text{em}}^{\text{max}}$ ) of PSF in varying compositions of dioxane–water mixtures. Compositions of the water–dioxane mixtures are provided in the legends. The sharp black profile in (b) represents the IRF.

**Table S1** Fluorescence lifetime of PSF in SDS solutions of different concentrations

| [SDS ] (mM) | Lifetime<br>( $\tau \pm 0.05 \text{ ns}$ ) | $\chi^2$ |
|-------------|--------------------------------------------|----------|
| 0           | 0.88                                       | 1.02     |
| 1.0         | 0.92                                       | 1.05     |
| 2.0         | 0.96                                       | 1.03     |
| 4.0         | 1.03                                       | 1.00     |
| 5.0         | 1.09                                       | 1.02     |
| 5.43        | 1.12                                       | 1.00     |
| 5.91        | 1.22                                       | 1.24     |
| 6.40        | 1.32                                       | 1.12     |
| 6.64        | 1.41                                       | 1.20     |
| 6.76        | 1.55                                       | 1.10     |
| 6.89        | 1.68                                       | 1.01     |
| 7.00        | 1.82                                       | 1.16     |
| 7.13        | 1.89                                       | 1.06     |
| 7.37        | 2.03                                       | 1.15     |
| 8.58        | 2.21                                       | 1.09     |
| 9.78        | 2.24                                       | 1.08     |
| 10.98       | 2.28                                       | 1.07     |
| 13.35       | 2.30                                       | 1.18     |

**Table S2** Fluorescence intensity ( $\lambda_{\text{exc}} = 520 \text{ nm}$ ) and lifetime ( $\lambda_{\text{exc}} = 490 \text{ nm}$ ,  $\lambda_{\text{em}} = \lambda_{\text{em}}^{\text{max}}$ ) of PSF with increasing concentration of LiCl in 6.64 mM SDS solution.

| [LiCl] (mM) | Fl. intensity (a.u.) | $F/F_0$ | Lifetime<br>( $\tau \pm 0.05 \text{ ns}$ ) | $\tau/\tau_0$ | $\chi^2$ |
|-------------|----------------------|---------|--------------------------------------------|---------------|----------|
| 0           | 4.82                 | 1.00    | 1.41                                       | 1             | 1.0      |
| 0.25        | 5.43                 | 1.13    | 1.48                                       | 1.05          | 1.15     |
| 0.5         | 5.69                 | 1.18    | 1.56                                       | 1.11          | 1.07     |
| 1.0         | 6.05                 | 1.26    | 1.68                                       | 1.19          | 1.0      |
| 1.5         | 6.31                 | 1.31    | 1.81                                       | 1.28          | 1.0      |
| 2.0         | 6.53                 | 1.35    | 1.91                                       | 1.35          | 1.11     |
| 2.5         | 6.72                 | 1.39    | 2.02                                       | 1.43          | 1.09     |
| 3.0         | 6.87                 | 1.43    | 2.11                                       | 1.50          | 1.07     |
| 4.0         | 7.04                 | 1.46    | 2.21                                       | 1.57          | 1.08     |
| 5.0         | 7.11                 | 1.48    | 2.22                                       | 1.57          | 1.16     |
| 6.0         | 7.18                 | 1.49    | 2.22                                       | 1.57          | 1.02     |

**Table S3** Fluorescence intensity ( $\lambda_{\text{exc}} = 520 \text{ nm}$ ) and lifetime ( $\lambda_{\text{exc}} = 490 \text{ nm}$ ,  $\lambda_{\text{em}} = \lambda_{\text{em}}^{\text{max}}$ ) of PSF with increasing concentration of NaCl in 6.64 mM SDS solution.

| [NaCl] (mM) | Fl. intensity (a.u.) | $F/F_0$ | Lifetime<br>( $\tau \pm 0.05 \text{ ns}$ ) | $\tau/\tau_0$ | $\chi^2$ |
|-------------|----------------------|---------|--------------------------------------------|---------------|----------|
| 0           | 4.77                 | 1.0     | 1.41                                       | 1             | 1.0      |



|      |      |      |      |      |      |
|------|------|------|------|------|------|
| 0.25 | 5.26 | 1.10 | 1.54 | 1.09 | 1.05 |
| 0.5  | 5.56 | 1.17 | 1.70 | 1.21 | 1.04 |
| 1.0  | 6.12 | 1.28 | 1.82 | 1.29 | 1.0  |
| 1.5  | 6.47 | 1.36 | 1.98 | 1.40 | 1.0  |
| 2.0  | 6.76 | 1.42 | 2.11 | 1.50 | 1.03 |
| 2.5  | 6.95 | 1.46 | 2.21 | 1.57 | 1.05 |
| 3.0  | 7.06 | 1.48 | 2.23 | 1.58 | 1.03 |
| 4.0  | 7.24 | 1.52 | 2.25 | 1.60 | 1.10 |
| 5.0  | 7.31 | 1.53 | 2.25 | 1.60 | 1.07 |
| 6.0  | 7.36 | 1.54 | 2.25 | 1.60 | 1.03 |

**Table S4** Fluorescence intensity ( $\lambda_{\text{exc}} = 520 \text{ nm}$ ) and lifetime ( $\lambda_{\text{exc}} = 490 \text{ nm}$ ,  $\lambda_{\text{em}} = \lambda_{\text{em}}^{\text{max}}$ ) of PSF with increasing concentration of KCl in 6.64 mM SDS solution.

| [KCl] (mM) | Fl. intensity (a.u.) | $F/F_0$ | Lifetime<br>( $\tau \pm 0.05 \text{ ns}$ ) | $\tau/\tau_0$ | $\chi^2$ |
|------------|----------------------|---------|--------------------------------------------|---------------|----------|
| 0          | 4.55                 | 1       | 1.40                                       | 1             | 1.03     |
| 0.25       | 5.07                 | 1.11    | 1.62                                       | 1.16          | 1.04     |
| 0.5        | 5.28                 | 1.16    | 1.83                                       | 1.31          | 1.03     |
| 1.0        | 6.11                 | 1.34    | 2.12                                       | 1.51          | 1.15     |
| 1.5        | 6.55                 | 1.44    | 2.23                                       | 1.60          | 1.02     |
| 2.0        | 6.88                 | 1.51    | 2.25                                       | 1.61          | 1.10     |
| 2.5        | 7.06                 | 1.55    | 2.26                                       | 1.61          | 1.05     |
| 3.0        | 7.18                 | 1.58    | 2.26                                       | 1.61          | 1.10     |
| 4.0        | 7.28                 | 1.60    | 2.27                                       | 1.62          | 1.0      |
| 5.0        | 7.33                 | 1.61    | 2.27                                       | 1.62          | 1.0      |
| 6.0        | 7.35                 | 1.62    | 2.28                                       | 1.63          | 1.03     |

**Table S5** Fluorescence intensity ( $\lambda_{\text{exc}} = 520 \text{ nm}$ ) and lifetime ( $\lambda_{\text{exc}} = 490 \text{ nm}$ ,  $\lambda_{\text{em}} = \lambda_{\text{em}}^{\text{max}}$ ) of PSF with increasing concentration of  $\text{NaNO}_3$  in 6.64 mM SDS solution.

| [NaNO <sub>3</sub> ] (mM) | Fl. intensity (a.u.) | $F/F_0$ | Lifetime<br>( $\tau \pm 0.05$ ns) | $\tau/\tau_0$ | $\chi^2$ |
|---------------------------|----------------------|---------|-----------------------------------|---------------|----------|
| 0                         | 4.60                 | 1       | 1.40                              | 1             | 1.09     |
| 0.015                     | 4.83                 | 1.05    | 1.55                              | 1.10          | 1.06     |
| 0.03                      | 4.92                 | 1.07    | 1.61                              | 1.15          | 1.12     |
| 0.045                     | 4.95                 | 1.08    | 1.64                              | 1.17          | 1.19     |
| 0.06                      | 5.02                 | 1.09    | 1.66                              | 1.19          | 1.18     |
| 0.09                      | 5.04                 | 1.10    | 1.66                              | 1.19          | 1.16     |
| 0.12                      | 5.10                 | 1.11    | 1.65                              | 1.16          | 1.18     |
| 0.15                      | 5.13                 | 1.12    | 1.67                              | 1.19          | 1.15     |
| 0.18                      | 5.09                 | 1.11    | 1.66                              | 1.19          | 1.17     |
| 0.25                      | 5.16                 | 1.12    | 1.70                              | 1.21          | 1.21     |
| 0.31                      | 5.24                 | 1.14    | 1.71                              | 1.22          | 1.09     |
| 0.37                      | 5.27                 | 1.14    | 1.72                              | 1.23          | 1.19     |
| 0.43                      | 5.30                 | 1.15    | 1.72                              | 1.21          | 1.17     |
| 0.50                      | 5.33                 | 1.16    | 1.72                              | 1.23          | 1.18     |

**Table S6** Fluorescence intensity ( $\lambda_{\text{exc}} = 520$  nm) and lifetime ( $\lambda_{\text{exc}} = 490$  nm,  $\lambda_{\text{em}} = \lambda_{\text{em}}^{\text{max}}$ ) of PSF with increasing concentration of Mg(NO<sub>3</sub>)<sub>2</sub> in 6.64 mM SDS solution.

| [Mg(NO <sub>3</sub> ) <sub>2</sub> ] (mM) | Fl. intensity (a.u.) | $F/F_0$ | Lifetime<br>( $\tau \pm 0.05$ ns) | $\tau/\tau_0$ | $\chi^2$ |
|-------------------------------------------|----------------------|---------|-----------------------------------|---------------|----------|
| 0                                         | 4.85                 | 1       | 1.41                              | 1             | 1.15     |
| 0.015                                     | 5.58                 | 1.15    | 1.65                              | 1.17          | 1.20     |
| 0.03                                      | 6.28                 | 1.30    | 1.78                              | 1.26          | 1.09     |
| 0.045                                     | 6.57                 | 1.35    | 1.89                              | 1.34          | 1.06     |
| 0.06                                      | 6.74                 | 1.40    | 2.0                               | 1.42          | 1.03     |
| 0.09                                      | 6.99                 | 1.44    | 2.11                              | 1.50          | 1.15     |
| 0.12                                      | 7.12                 | 1.47    | 2.14                              | 1.52          | 1.09     |
| 0.15                                      | 7.14                 | 1.47    | 2.19                              | 1.55          | 1.15     |
| 0.18                                      | 7.17                 | 1.48    | 2.20                              | 1.56          | 1.03     |
| 0.25                                      | 7.23                 | 1.50    | 2.21                              | 1.57          | 1.06     |
| 0.37                                      | 7.29                 | 1.50    | 2.22                              | 1.57          | 1.06     |
| 0.43                                      | 7.31                 | 1.51    | 2.22                              | 1.57          | 1.05     |
| 0.31                                      | 7.26                 | 1.50    | 2.21                              | 1.57          | 1.02     |
| 0.50                                      | 7.31                 | 1.51    | 2.21                              | 1.57          | 1.09     |

**Table S7** Fluorescence intensity ( $\lambda_{\text{exc}} = 520$  nm) and lifetime ( $\lambda_{\text{exc}} = 490$  nm,  $\lambda_{\text{em}} = \lambda_{\text{em}}^{\text{max}}$ ) of PSF with increasing concentration of Al(NO<sub>3</sub>)<sub>3</sub> in 6.64 mM SDS solution.

| [Al(NO <sub>3</sub> ) <sub>3</sub> ] (mM) | Fl. intensity (a.u.) | $F/F_0$ | Lifetime<br>( $\tau \pm 0.05$ ns) | $\tau/\tau_0$ | $\chi^2$ |
|-------------------------------------------|----------------------|---------|-----------------------------------|---------------|----------|
| 0                                         | 4.35                 | 1       | 1.42                              | 1             | 1.15     |
| 0.015                                     | 4.98                 | 1.14    | 1.73                              | 1.22          | 1.20     |
| 0.03                                      | 5.54                 | 1.27    | 1.84                              | 1.30          | 1.09     |
| 0.045                                     | 6.09                 | 1.40    | 1.95                              | 1.37          | 1.06     |
| 0.06                                      | 6.45                 | 1.48    | 2.08                              | 1.46          | 1.03     |
| 0.09                                      | 6.62                 | 1.52    | 2.18                              | 1.54          | 1.15     |
| 0.12                                      | 6.87                 | 1.56    | 2.22                              | 1.56          | 1.09     |
| 0.15                                      | 6.94                 | 1.60    | 2.23                              | 1.57          | 1.15     |
| 0.18                                      | 7.00                 | 1.61    | 2.25                              | 1.58          | 1.03     |
| 0.25                                      | 7.14                 | 1.64    | 2.26                              | 1.59          | 1.06     |
| 0.37                                      | 7.20                 | 1.66    | 2.27                              | 1.60          | 1.06     |
| 0.43                                      | 7.24                 | 1.66    | 2.28                              | 1.61          | 1.05     |
| 0.31                                      | 7.18                 | 1.65    | 2.26                              | 1.59          | 1.02     |
| 0.50                                      | 7.25                 | 1.67    | 2.27                              | 1.60          | 1.09     |
